# Supplementary material
Source: publisher figshare collection journal article supplement (https://gsapubs.figshare.com/articles/dataset/_/23118149)

Li, S.-Y., Duan, Z., Gao, J.-L., Hu, H., Wen, G., and Li, J.-W., 2023, Controls on metal fertility of dioritic intrusions in the Laiwu district, North China craton: Insights from whole-rock geochemistry and mineral compositions: GSA Bulletin, <https://doi.org/10.1130/B36870.1>.

## Supplemental Material

**Table S1.** Major and trace elements geochemistry of whole-rock samples from the Fe-mineralized and barren dioritic intrusions in the Laiwu district.

**Table S2.** Sr-Nd isotopic compositions of whole-rock samples from the Fe-mineralized and barren plutons in the Laiwu district.

**Table S3.** Major and trace element compositions of amphibole from the Fe-mineralized and barren plutons in the Laiwu district.

**Table S4.** U-Pb age data and trace elements of zircon from the Fe-mineralized and barren plutons in the Laiwu district.

**Table S5.** Major and trace elements of apatite from the Fe-mineralized and barren plutons in the Laiwu district.

**Figure S1.** Hand specimens of diorites were collected from the Kuangshan (A), Jiaoyu (B), Jinniushan (C), and Tietonggou plutons (D).

**Figure S2.** CL images of representative zircons from the Kuangshan (A), Jiaoyu (B), Jinniushan (C), and Tietongggou diorite (D). Scale bar is 100  $\mu\text{m}$ .

**Figure S3.** U-Pb Concordia diagrams of zircons from the Kuangshan (A), Jiaoyu (B), Jinniushan (C), and Tietongggou plutons (D). The insets in each diagram are the weighted mean  $^{206}\text{Pb}/^{238}\text{U}$  age.

**Figure S4.** Selected oxide element Harker's plots for the Fe-mineralized and barren plutons in the Laiwu district.



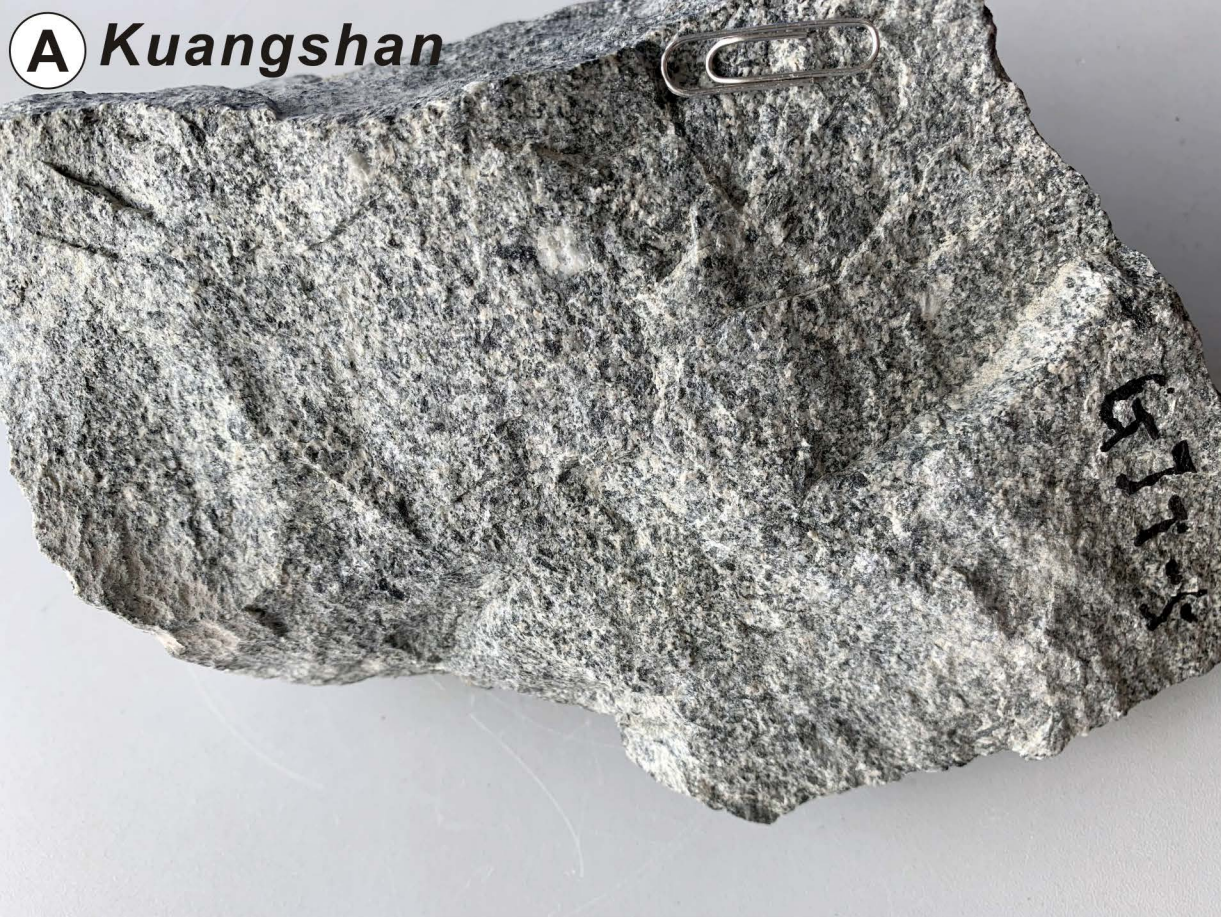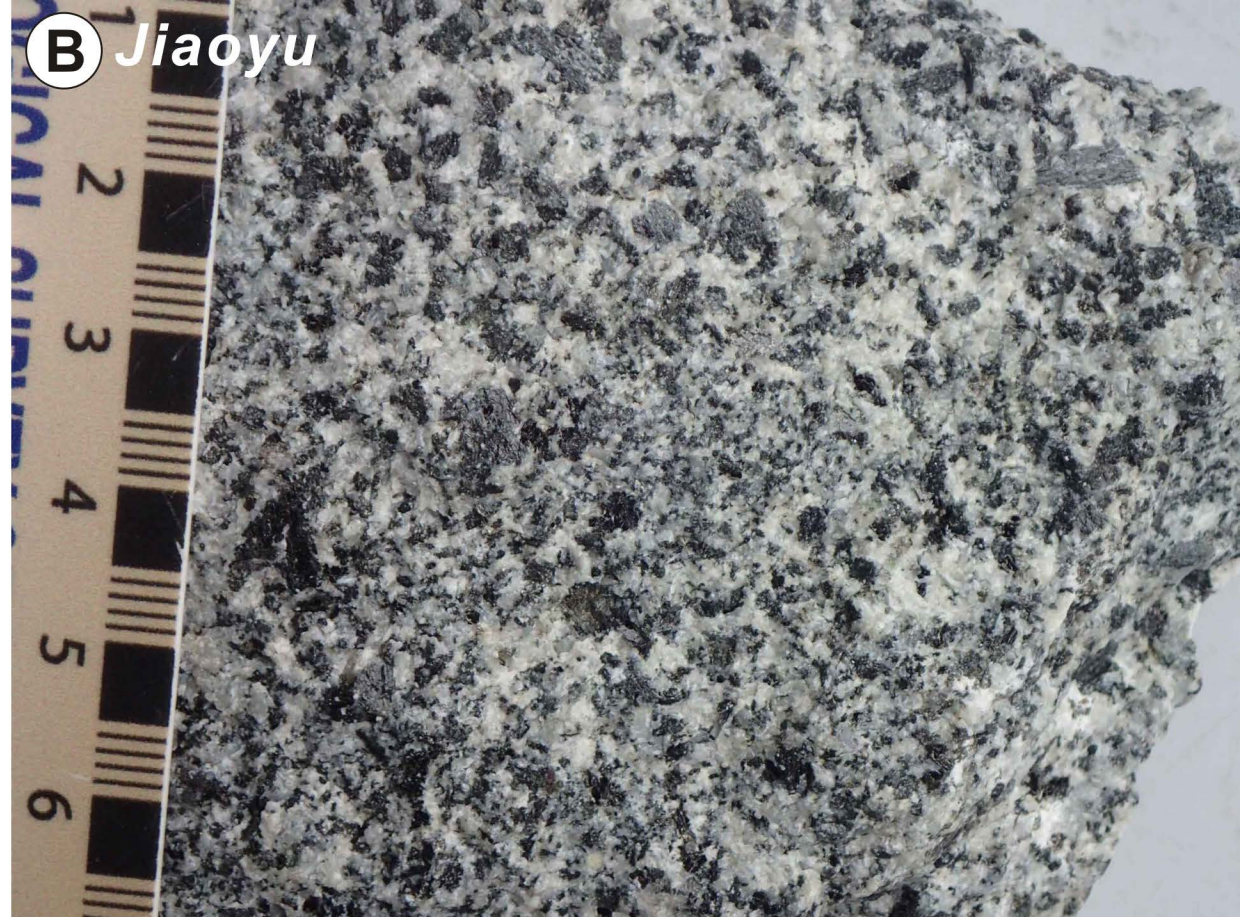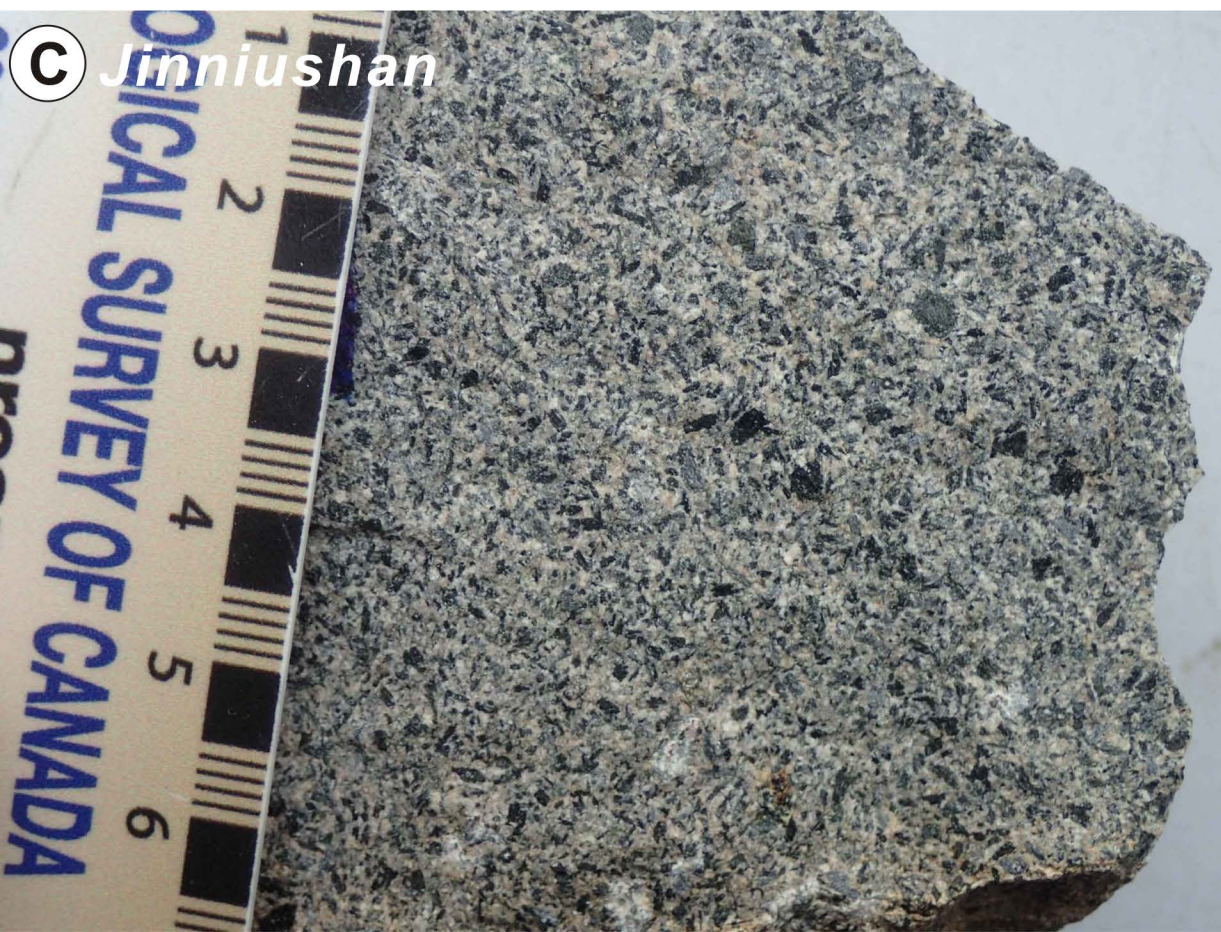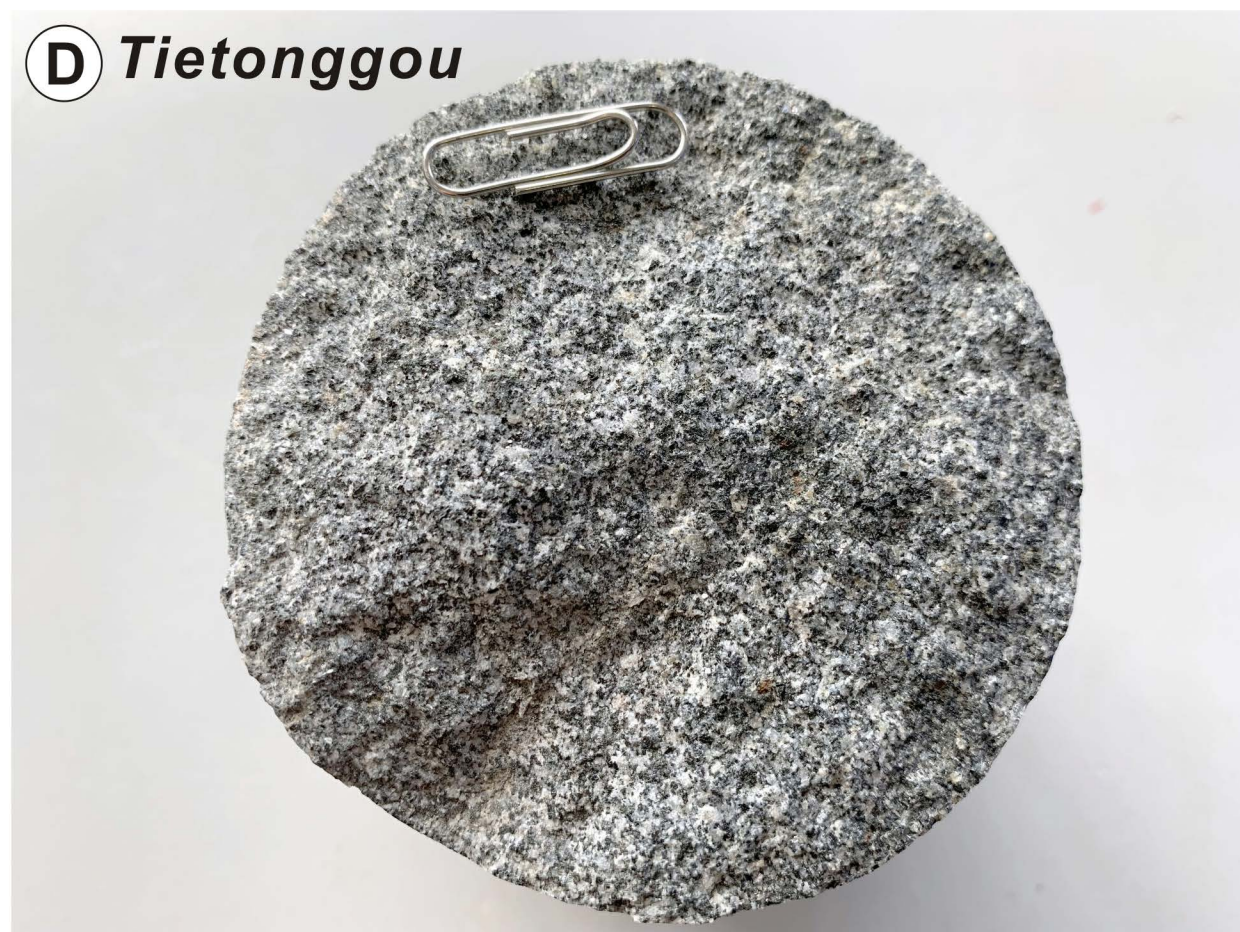



**GJT-2****(A)**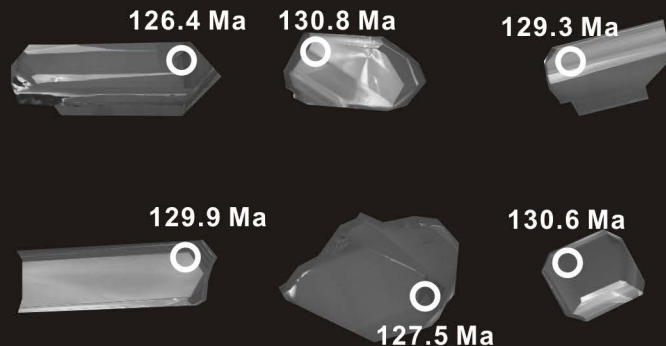**JY-9****(B)**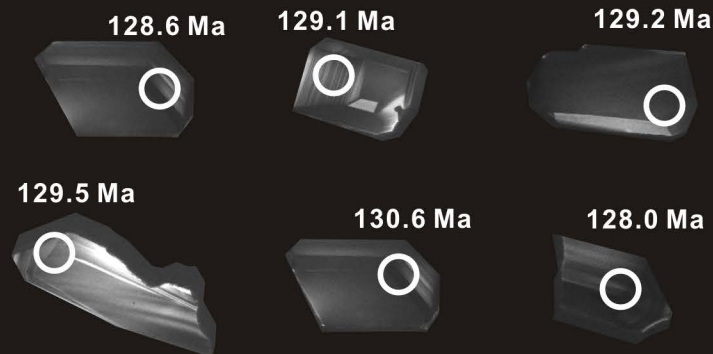**TS-8****(C)**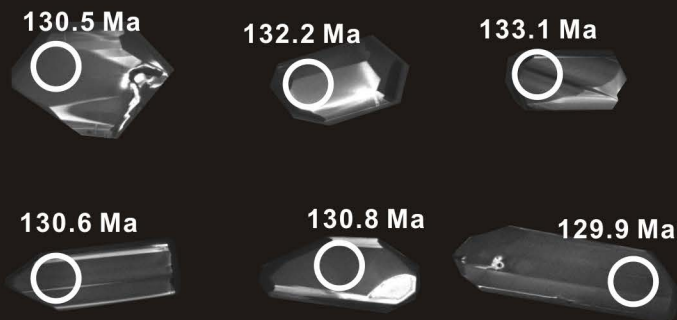**TTG-41****(D)**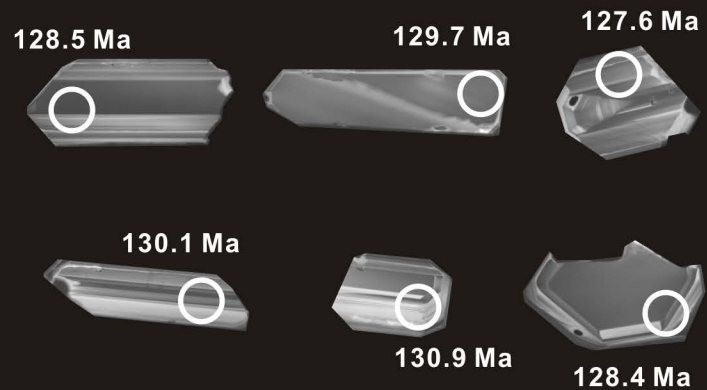

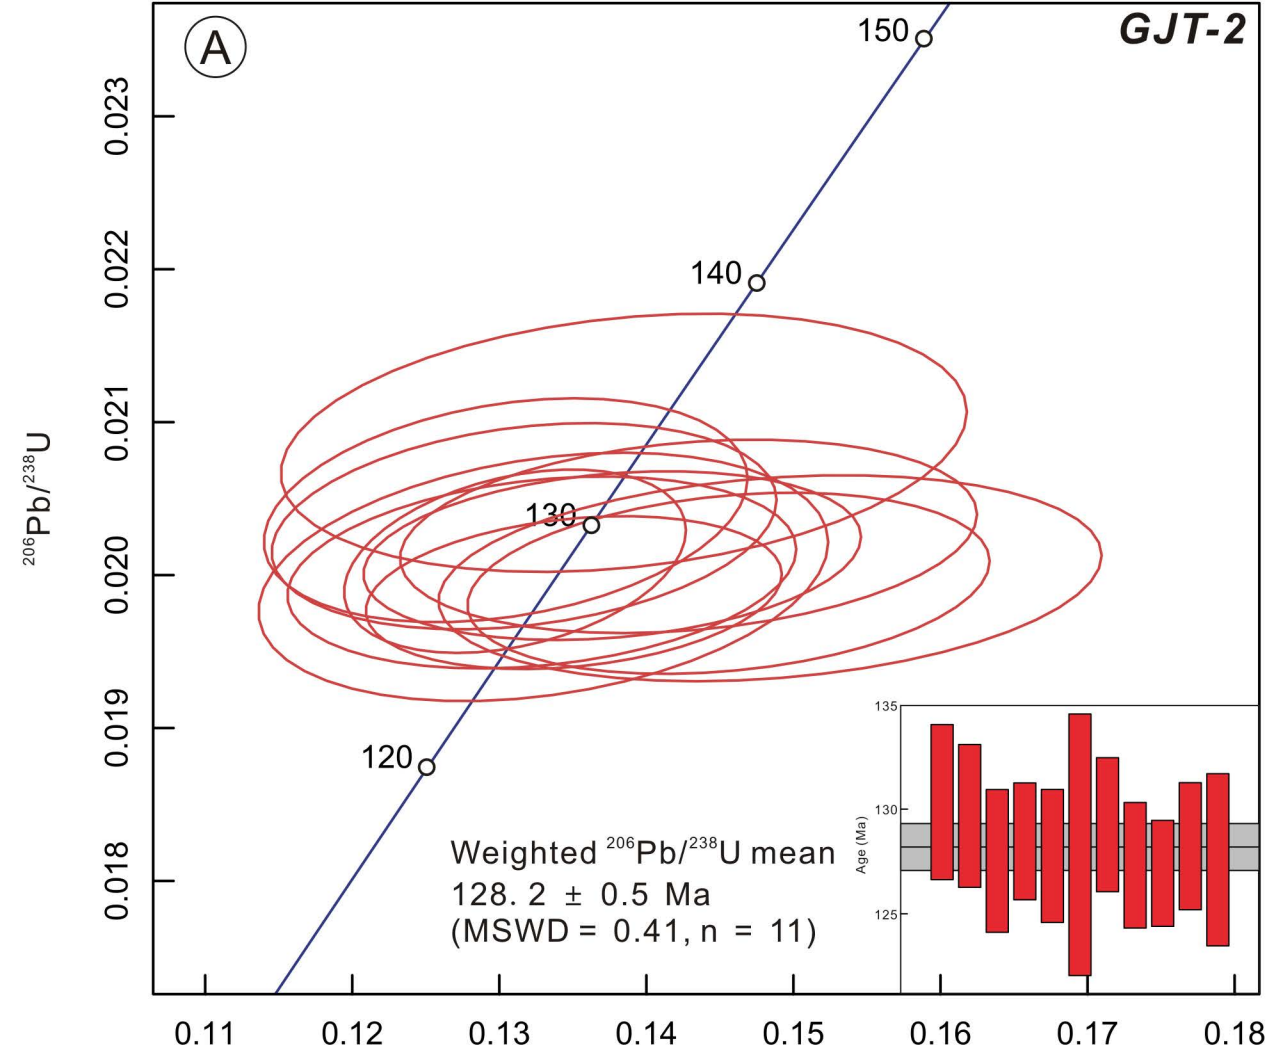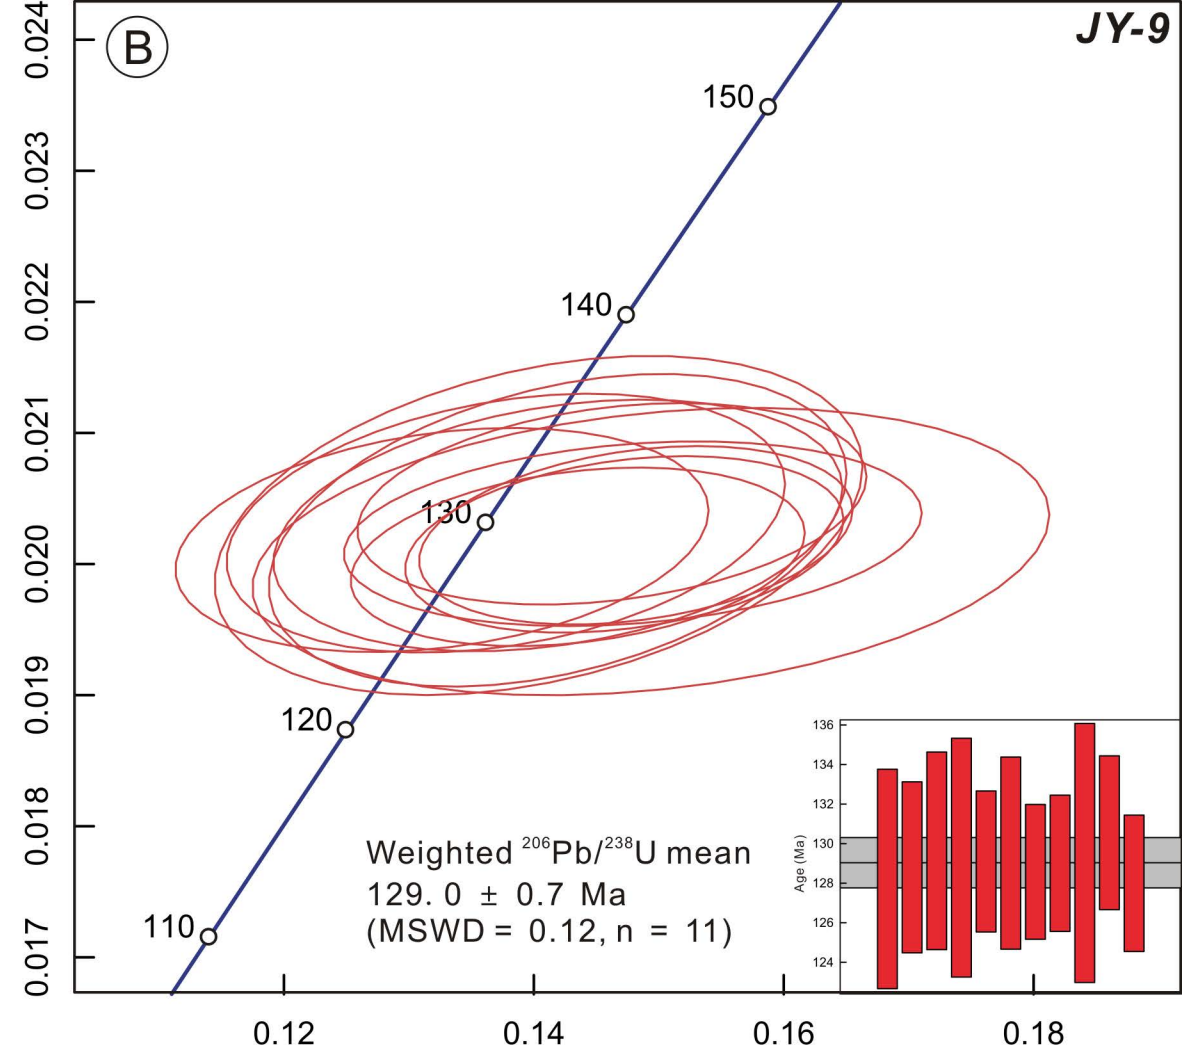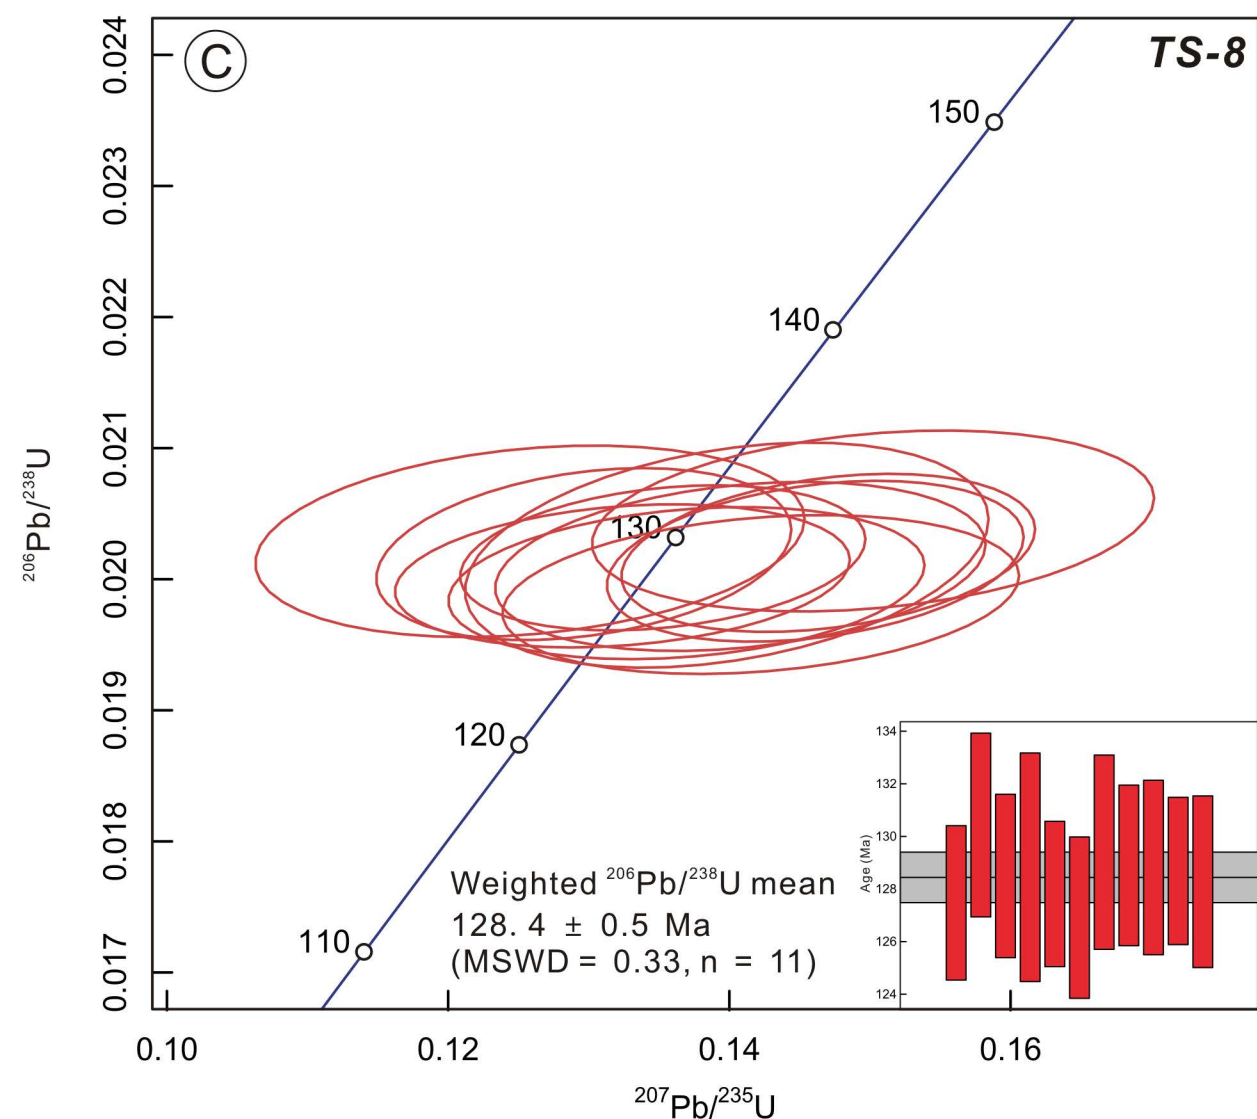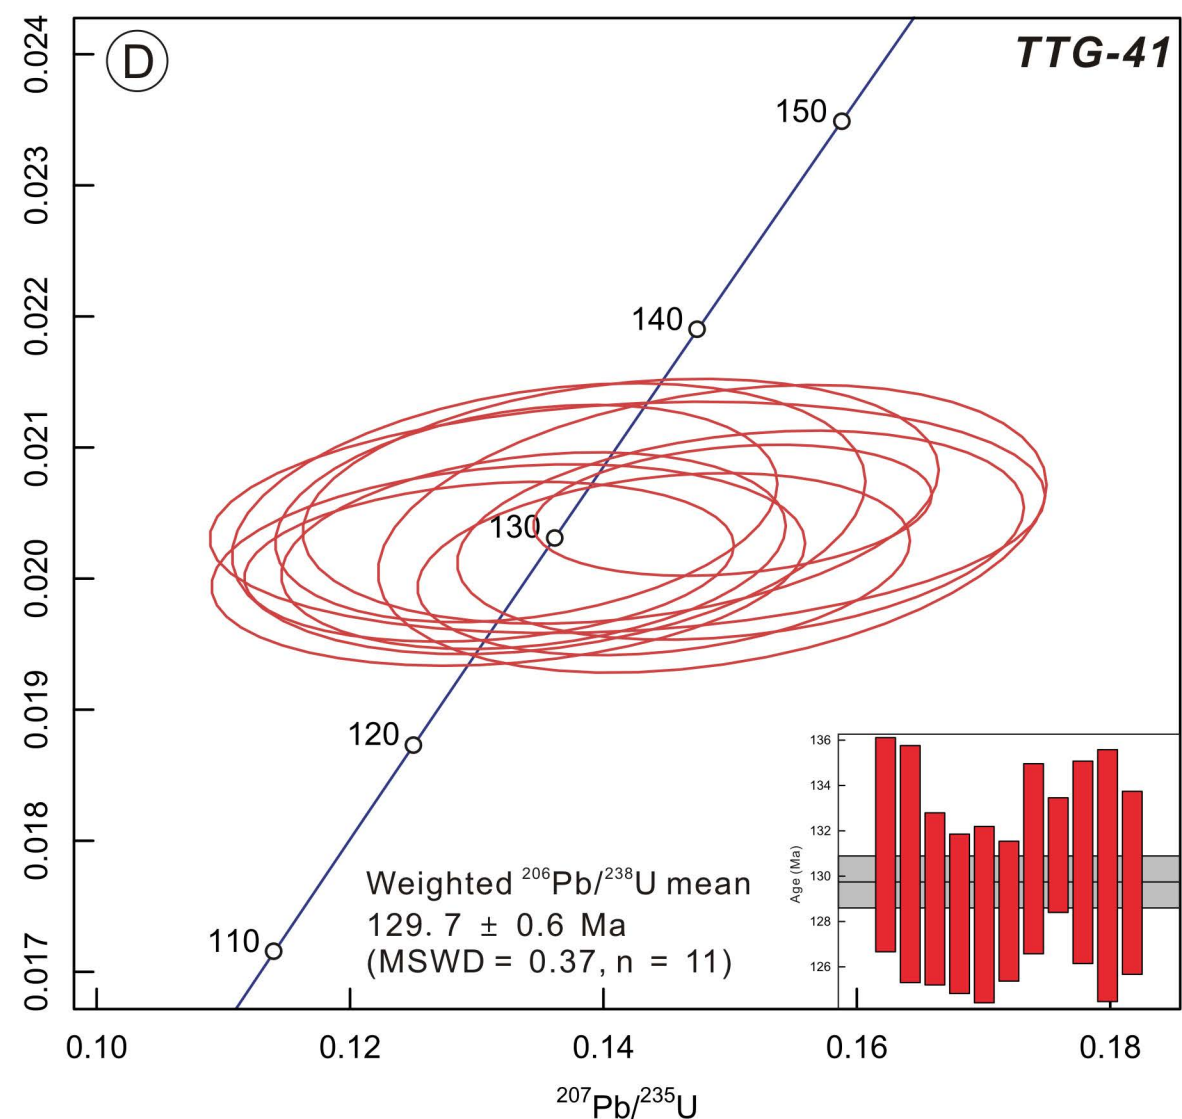

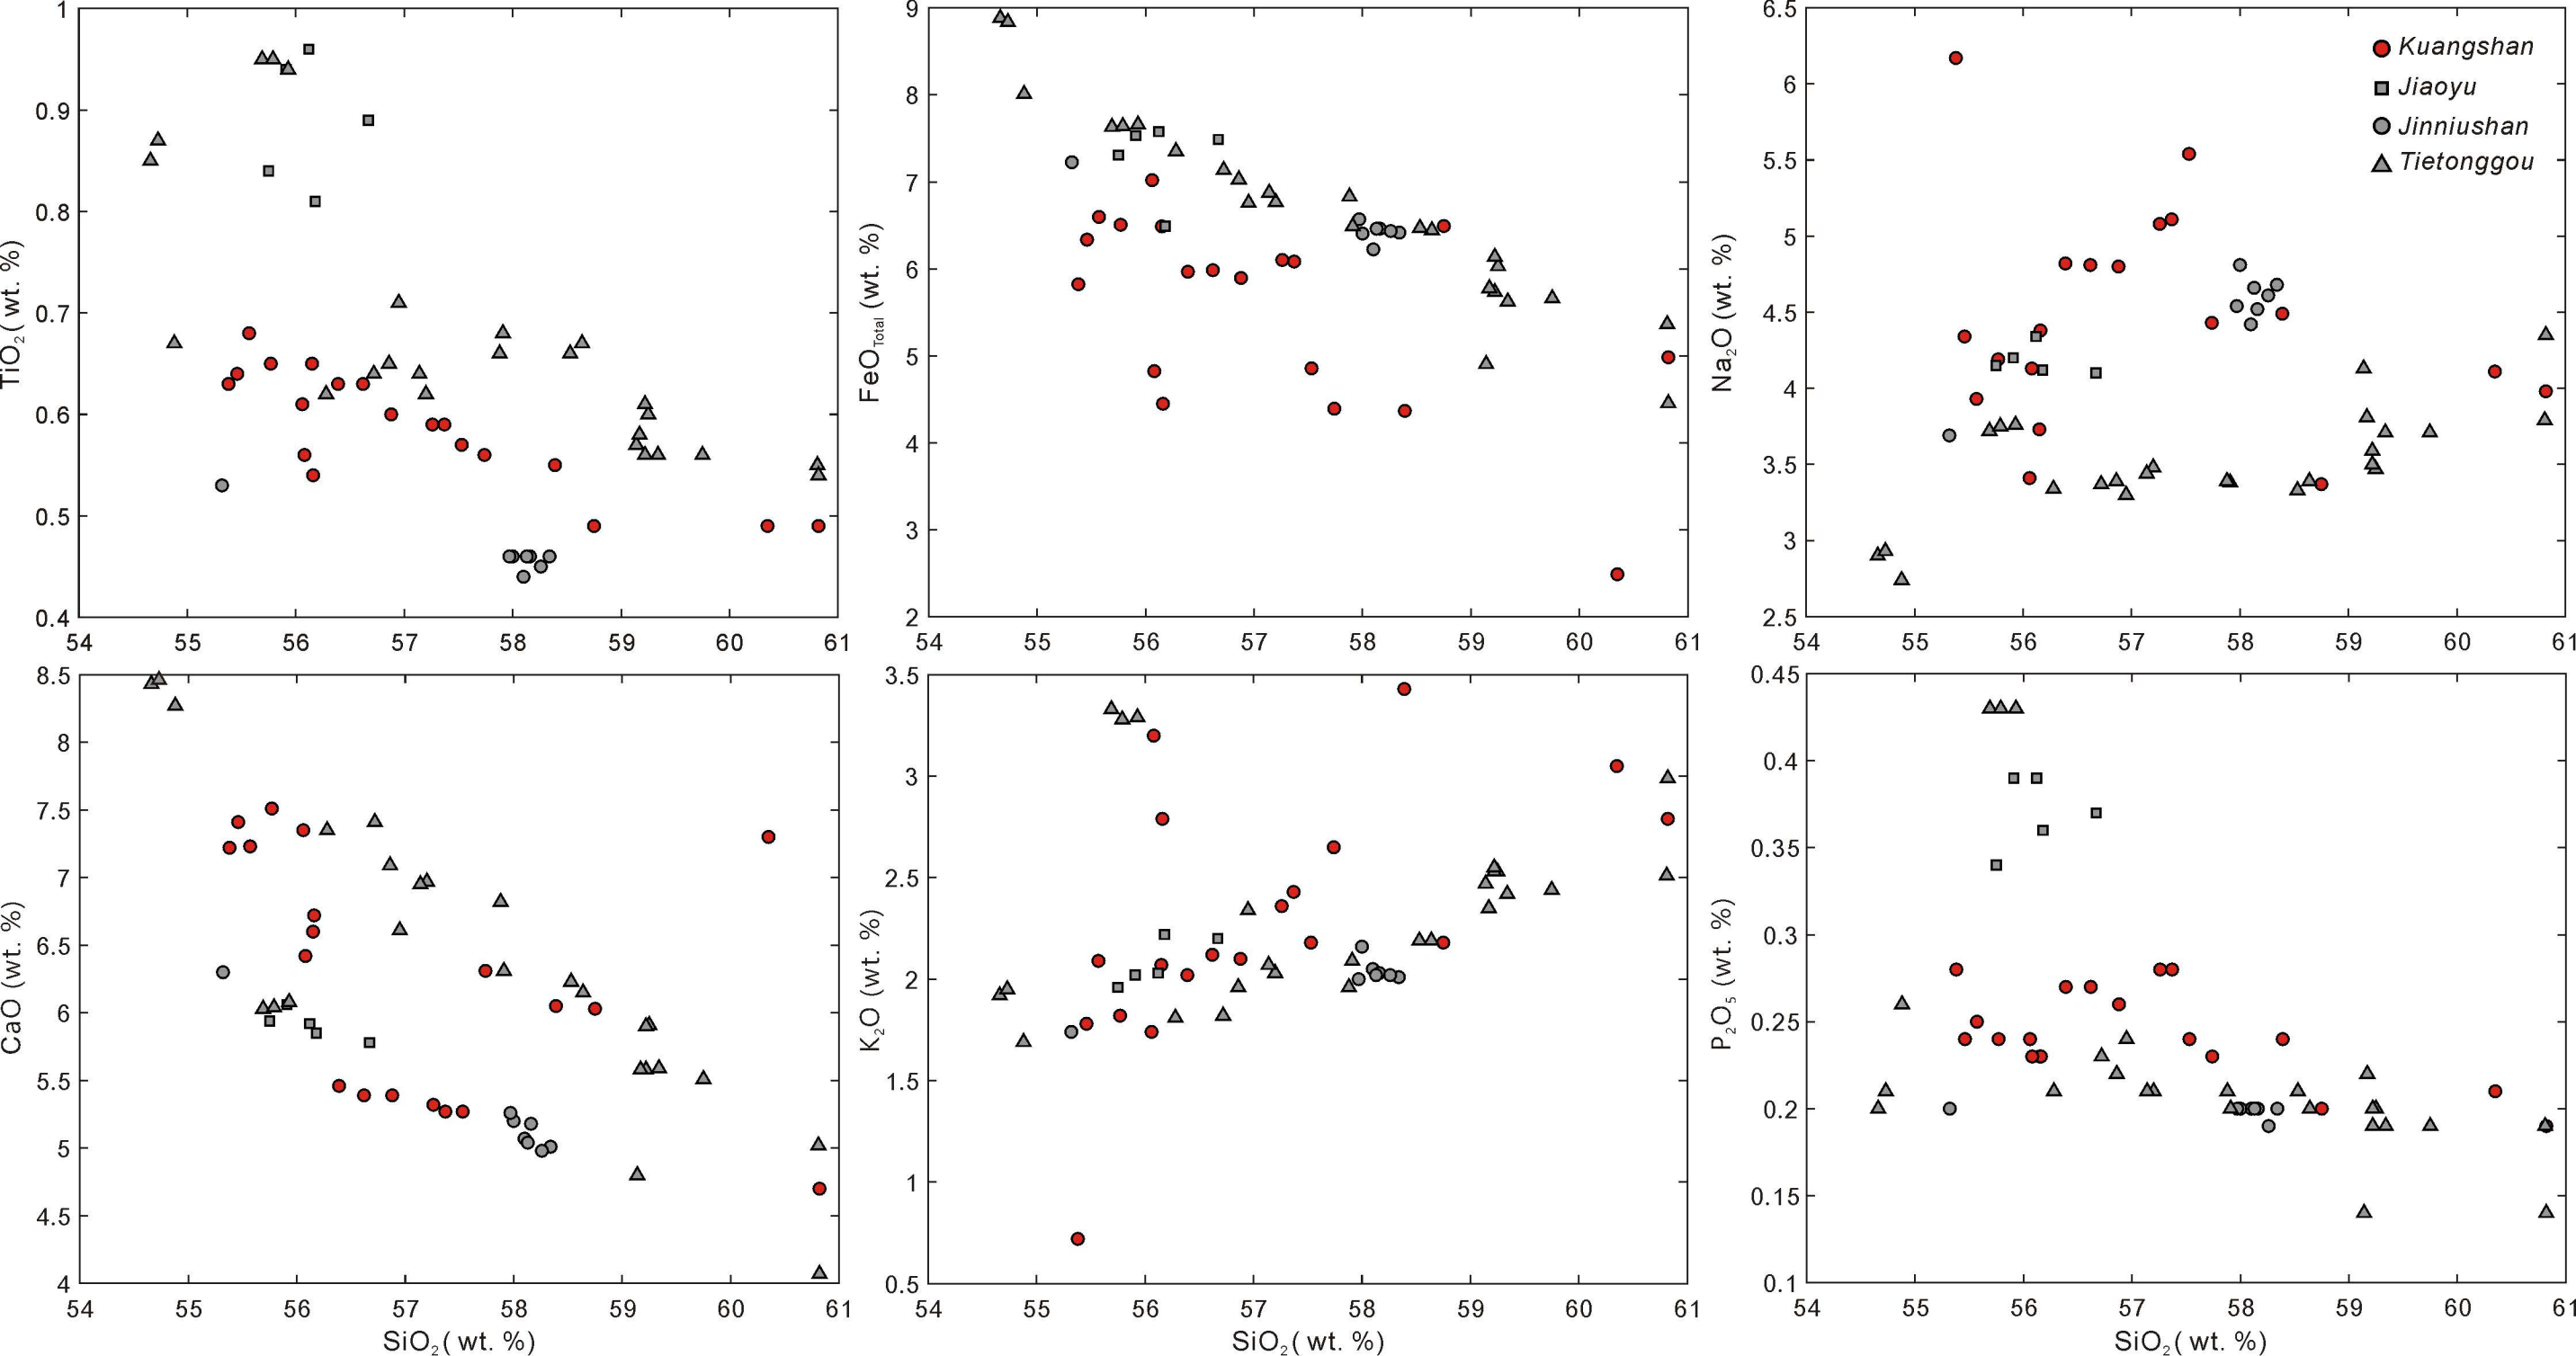

Supplement: Supplementary file 1 [file 1]
