# Supplementary material
Source: publisher figshare collection journal article supplement (https://gsapubs.figshare.com/articles/dataset/_/23118149)
Supplement: Supplementary file 1 [file 1]

## Sheet: Age
Table S4. U-Pb age data and trace elements of zircon from the Fe-mineralized and barren plutons in the Laiwu district
Results of LA-ICP-MS zircon U-Pb geochronology
	Contents (ESIS)		Pb	Th	U	Pb	207Pb/206Pb	207Pb/206Pb	207Pb/235U	207Pb/235U	206Pb/238U	206Pb/238U		208Pb/232Th	208Pb/232Th	238U/232Th	207Pb/206Pb	207Pb/206Pb	207Pb/235U	207Pb/235U	206Pb/238U	206Pb/238U	208Pb/232Th	208Pb/232Th	Concordance
			Total	232	238	Common Pb	Ratio	1sigma	Ratio	1sigma	Ratio	1sigma	rho	Ratio	1sigma	Ratio	Age (Ma)	1sigma	Age (Ma)	1sigma	Age (Ma)	1sigma	Age (Ma)	1sigma
			ppm	ppm	ppm	ppm
Kuangshan diorite
Rep	AUG28P11	GJT-2-01	17.5542	823.26	582.992	1.7857	0.0467548	0.0033453	0.130434	0.00672091	0.020424	0.000299135	0.284244	0.00738473	0.000225278	0.535271	35.28	162.95	124.488	6.03747	130.335	1.89106	148.713	4.51999	95%
Rep	AUG28P12	GJT-2-02	15.5439	793.361	537.35	0.883365	0.0466086	0.00252321	0.131685	0.00701492	0.0203196	0.000275454	0.254477	0.00632735	0.000189543	0.50742	27.875	125.915	125.611	6.29459	129.675	1.74174	127.487	3.80699	96%
Rep	AUG28P13	GJT-2-03	14.669	736.057	512.306	0.159271	0.0529541	0.00333937	0.148408	0.00921424	0.0199793	0.000275238	0.221883	0.00647807	0.000192021	0.521918	327.835	144.425	140.505	8.14748	127.525	1.74091	130.514	3.85619	90%
Rep	AUG28P14	GJT-2-04	13.1667	643.612	468.644	0.296263	0.0494853	0.00263075	0.137677	0.00691354	0.0201272	0.000225349	0.222962	0.00627185	0.000157807	0.545184	172.305	128.685	130.972	6.17102	128.46	1.42572	126.372	3.16975	98%
Rep	AUG28P15	GJT-2-05	27.2706	1915.18	792.845	1.18542	0.0480836	0.00272013	0.13289	0.00707042	0.0200171	0.000256428	0.240776	0.00648047	0.000156561	0.319256	101.94	129.61	126.692	6.33764	127.764	1.62207	130.562	3.14407	99%
Rep	AUG28P17	GJT-2-07	15.799	720.03	535.891	2.14715	0.0533552	0.00481206	0.149594	0.00976752	0.0201015	0.00050431	0.384236	0.0066328	0.000234424	0.556935	342.65	237.933	141.553	8.62774	128.297	3.18768	133.621	4.70702	90%
Rep	AUG28P20	GJT-2-08	13.2394	641.877	460.166	0	0.0509925	0.00292228	0.142863	0.00801702	0.0202532	0.000258419	0.227373	0.00654656	0.000193652	0.53952	238.955	133.315	135.591	7.12336	129.256	1.6343	131.889	3.88867	95%
Rep	AUG28P21	GJT-2-09	11.5995	549.182	425.826	0	0.0527073	0.00276895	0.145585	0.00725585	0.0199465	0.000242058	0.243488	0.00613196	0.000170103	0.581618	316.725	120.355	138.006	6.43187	127.318	1.53143	123.562	3.41721	91%
Rep	AUG28P22	GJT-2-10	21.4536	1238.18	724.568	0	0.0492959	0.00217673	0.135065	0.0057802	0.0198855	0.00020427	0.240031	0.00613956	0.000142453	0.439348	161.195	103.688	128.639	5.17147	126.932	1.29295	123.715	2.86173	98%
Rep	OCT14M11	GJT-2-11	13.9171	734.085	488.799	0	0.0474838	0.00186237	0.131066	0.00474956	0.0200906	0.000245001	0.336521	0.006491	0.000134878	0.714041	72.315	92.585	125.055	4.26464	128.229	1.54982	130.774	2.70861	97%
Rep	OCT14M12	GJT-2-12	13.7307	755.931	475.516	0	0.0478451	0.00286615	0.132994	0.00791496	0.019988	0.000331932	0.279037	0.00644807	0.000134182	0.670746	100.09	127.755	126.784	7.09387	127.58	2.09897	129.911	2.69474	99%
Rep	OCT14M13	GJT-2-13	13.1616	652.891	429.208	0.604409	0.0477617	0.00328426	0.138467	0.00953224	0.0208651	0.000345053	0.240224	0.00698661	0.000208975	0.704801	87.13	155.53	131.677	8.50215	133.121	2.18008	140.724	4.19455	98%
Jiaoyu diorite
Rep	AUG28R13	Jy-9-01	6.76	241.211	218.619	0	0.0475758	0.00581589	0.14936	0.0130337	0.0200952	0.000447877	0.255407	0.00733284	0.000237561	0.920593	79.72	266.63	141.347	11.5148	128.258	2.83117	147.672	4.76669	90%
Rep	AUG28R14	Jy-9-02	8.49976	420.685	288.648	0.570972	0.0480512	0.00345363	0.132645	0.00871878	0.0201835	0.000349167	0.263192	0.00685875	0.000156295	0.714486	101.94	162.94	126.472	7.8166	128.816	2.20744	138.157	3.13755	98%
Rep	AUG28R15	Jy-9-03	3.63179	136.574	135.186	0.230788	0.0511051	0.00459004	0.137754	0.00913382	0.0203124	0.000403508	0.299601	0.006633	0.000290886	1.00467	255.62	202.752	131.041	8.15192	129.63	2.55036	133.625	5.8407	98%
Rep	AUG28R16	Jy-9-04	2.09656	51.7541	84.1887	0	0.0580162	0.00573621	0.141901	0.00944856	0.0202576	0.000487383	0.36133	0.00776222	0.0003792	1.64715	531.52	223.12	134.736	8.40219	129.284	3.08028	156.286	7.60544	95%
Rep	AUG28R17	Jy-9-05	5.91744	221.419	219.537	0	0.0548408	0.00393687	0.147916	0.00945126	0.0202312	0.000287798	0.222635	0.00685598	0.000205182	1.00167	405.605	165.725	140.071	8.36061	129.117	1.81981	138.102	4.11894	91%
Rep	AUG28R20	Jy-9-06	5.70528	229.765	209.5	0	0.0531964	0.00418801	0.141921	0.00930546	0.0202944	0.000392273	0.294795	0.00677397	0.000236026	0.933577	344.5	177.755	134.753	8.27482	129.516	2.47944	136.455	4.73851	96%
Rep	AUG28R21	Jy-9-07	6.65912	262.149	244.961	0.618356	0.0540188	0.00303073	0.147237	0.00716843	0.0201499	0.000275108	0.28043	0.00678155	0.000182756	0.952476	372.275	127.765	139.469	6.34526	128.603	1.73982	136.608	3.66902	91%
Rep	AUG28R22	Jy-9-08	9.11575	415.064	317.267	0	0.0531975	0.00255198	0.14816	0.00708928	0.0202193	0.000278096	0.287447	0.00661629	0.000144117	0.776486	344.5	104.62	140.286	6.27018	129.042	1.75857	133.29	2.89378	91%
Rep	AUG28R23	Jy-9-09	3.21767	112.456	120.75	0.815661	0.0521809	0.00505244	0.140373	0.0105942	0.0202944	0.000528725	0.345199	0.00670882	0.000300067	1.09316	294.505	222.195	133.376	9.43348	129.516	3.34132	135.147	6.02461	97%
Rep	AUG28R24	Jy-9-10	6.24398	271.15	215.858	0.250495	0.0520435	0.00331304	0.14625	0.00832545	0.0204593	0.00031402	0.269622	0.00691796	0.000176665	0.817909	287.1	113.875	138.595	7.37554	130.558	1.98497	139.346	3.54626	94%
Rep	AUG28R25	Jy-9-11	7.80075	329.055	286.107	0.935154	0.0522356	0.00280938	0.143509	0.00742663	0.0200549	0.000278291	0.268143	0.00649119	0.000172055	0.894457	294.505	122.205	136.165	6.59515	128.003	1.76007	130.777	3.45518	93%
Jinniushan diorite
Rep	AUG28P80	Ts-8-01	15.3634	897.345	493.393	0.037894	0.0493947	0.00250396	0.136949	0.00691867	0.0199702	0.000236977	0.234887	0.00649967	0.000135475	0.568384	164.9	118.5	130.322	6.17954	127.468	1.49932	130.948	2.72056	97%
Rep	AUG28P81	Ts-8-02	15.7972	926.229	481.292	0.00388244	0.0533953	0.00329354	0.150216	0.00816804	0.0204441	0.000282061	0.253731	0.00673677	0.000159151	0.530203	346.35	140.72	142.103	7.2112	130.462	1.78325	135.709	3.19528	91%
Rep	AUG28P84	Ts-8-03	12.2676	666.532	402.529	1.51746	0.0524343	0.00244865	0.146107	0.00605611	0.020137	0.000250717	0.300376	0.00664074	0.000149356	0.634186	305.615	105.54	138.469	5.36618	128.522	1.58584	133.78	2.9989	92%
Rep	AUG28P85	Ts-8-04	4.85894	196.061	173.813	0.675235	0.0514709	0.00360778	0.139813	0.00760782	0.0201837	0.000350827	0.319434	0.0068845	0.00021912	0.900541	261.175	158.312	132.878	6.7779	128.817	2.21793	138.674	4.39862	96%
Rep	AUG28P86	Ts-8-05	15.1756	747.909	519.394	0.218986	0.0481665	0.00245936	0.132392	0.00661096	0.0200254	0.000223076	0.223084	0.00661135	0.000143963	0.706844	105.645	127.755	126.245	5.92847	127.817	1.4115	133.19	2.8907	98%
Rep	AUG28P87	Ts-8-06	9.23837	428.475	323.434	0	0.0524703	0.00312747	0.142232	0.00750863	0.0198832	0.000247576	0.235862	0.00657219	0.000154202	0.76847	305.615	135.165	135.03	6.6754	126.918	1.56636	132.404	3.09641	93%
Rep	AUG28P88	Ts-8-07	6.37771	262.227	235.496	0	0.0462556	0.00330313	0.125816	0.00797981	0.0202889	0.00029854	0.231999	0.00630762	0.000169044	0.93961	9.36	166.65	120.331	7.19752	129.482	1.88754	127.091	3.39534	92%
Rep	AUG28P89	Ts-8-08	15.1811	827.195	482.206	0	0.0528547	0.00227353	0.14703	0.00601272	0.020201	0.000246421	0.298291	0.00654722	0.000128133	0.596246	324.13	98.1375	139.286	5.32347	128.926	1.55863	131.903	2.573	92%
Rep	AUG28P90	Ts-8-09	18.4275	1108.13	554.063	0	0.0466215	0.00246793	0.129646	0.0060309	0.0201917	0.000268019	0.285345	0.00662042	0.00012524	0.50831	31.58	122.21	123.78	5.42153	128.868	1.695	133.373	2.51474	95%
Rep	AUG28P91	Ts-8-10	14.5272	757.548	479.087	0.258947	0.048555	0.00208441	0.135264	0.00588904	0.020163	0.000226152	0.257623	0.00642677	0.000136609	0.645228	127.865	106.465	128.817	5.2679	128.686	1.43075	129.484	2.74355	99%
Rep	OCT14M22	Ts-8-11	8.52168	403.08	308.06	0.669409	0.0514005	0.00282834	0.140779	0.00712691	0.0200976	0.000263463	0.258947	0.006291	0.00014148	0.794167	257.47	130.537	133.737	6.34417	128.273	1.66637	126.757	2.84174	95%
Tietonggou diorite
Rep	AUG28Q24	Ttg-41-01	2.71946	53.9686	115.462	0.499543	0.0512134	0.00434346	0.14136	0.0102571	0.0205897	0.000381585	0.255414	0.00615565	0.00028241	2.20307	250.065	196.27	134.255	9.12542	131.382	2.41128	124.038	5.6732	97%
Rep	AUG28Q25	Ttg-41-02	3.48624	66.9942	131.457	0.907984	0.0499686	0.0052539	0.135678	0.0102163	0.0204568	0.00042232	0.274171	0.0113938	0.000641945	2.05394	194.525	225.895	129.187	9.13455	130.542	2.6688	228.993	12.829	98%
Rep	AUG28Q26	Ttg-41-03	6.76026	293.469	247.384	0	0.0485923	0.00313008	0.13448	0.00813557	0.020213	0.000306635	0.250762	0.00633258	0.000174682	0.863004	127.865	144.42	128.116	7.28202	129.002	1.93878	127.592	3.50849	99%
Rep	AUG28Q29	Ttg-41-04	7.11167	268.774	268.914	0.990918	0.0525559	0.00295973	0.144755	0.00794263	0.0201101	0.000283789	0.25719	0.00640322	0.000164623	1.05046	309.32	127.76	137.271	7.04562	128.352	1.7947	129.011	3.30622	93%
Rep	AUG28Q30	Ttg-41-05	6.50883	191.05	259.946	0.214791	0.0483164	0.00382035	0.132491	0.00957353	0.0201036	0.000314035	0.21618	0.00688586	0.000237061	1.39553	122.31	177.75	126.333	8.58398	128.311	1.98571	138.702	4.75876	98%
Rep	AUG28Q31	Ttg-41-06	8.74478	315.147	334.695	1.70154	0.0472131	0.00291063	0.130972	0.00789545	0.0201289	0.000249226	0.205388	0.00661225	0.000184089	1.09559	61.205	149.98	124.971	7.08902	128.47	1.57644	133.208	3.6964	97%
Rep	AUG28Q32	Ttg-41-07	6.56738	215.415	240.444	0.82538	0.0478677	0.00394231	0.133909	0.00809784	0.0204963	0.000338778	0.273326	0.00742768	0.0002314	1.17252	100.09	175.9	127.604	7.2519	130.792	2.1412	149.575	4.64262	97%
Rep	AUG28Q33	Ttg-41-08	11.1445	463.074	395.583	0	0.0529834	0.00229308	0.150194	0.00642411	0.0205212	0.000204258	0.23271	0.0067982	0.000148603	0.883899	327.835	99.99	142.083	5.67198	130.949	1.29219	136.942	2.98333	91%
Rep	AUG28Q34	Ttg-41-09	4.36192	102.455	178.367	0	0.0515746	0.00539174	0.141892	0.013473	0.020467	0.000360551	0.185526	0.00688988	0.000410671	1.79098	264.88	247.192	134.728	11.9807	130.607	2.27874	138.782	8.24377	96%
Rep	AUG28Q35	Ttg-41-10	4.90088	161.267	189.636	0	0.0537629	0.00426596	0.148588	0.0107819	0.0203796	0.000448539	0.303312	0.00655596	0.000223209	1.22364	361.165	179.607	140.664	9.532	130.055	2.83459	132.078	4.48217	92%
Rep	AUG28Q36	Ttg-41-11	4.48939	164.024	168.017	0	0.053907	0.00352069	0.150822	0.00914044	0.0203313	0.000325887	0.264485	0.00700503	0.000246365	1.05126	368.57	148.132	142.638	8.06529	129.749	2.06014	141.094	4.94494	90%

## Sheet: Trace element
Trace element compositions of zircon.
	Sample type	Data source	La	Ce	Pr	Nd	Sm	Eu	Gd	Tb	Dy	Ho	Er	Tm	Yb	Lu	Y	Ti	Hf	Th	U	Age	Th/U	1Temprature (based on Ti)	2ΔFMQ	3log fO2@FMQ	4log fO2(sample)	Eu/Eu*	10000*(Eu/Eu*)/y	(Ce/Nd)/Y	Dy/Yb
			ppm	ppm	ppm	ppm	ppm	ppm	ppm	ppm	ppm	ppm	ppm	ppm	ppm	ppm	ppm	ppm	ppm	ppm	ppm
Kuangshan Pluton
GJT-2-01	Diorite	This study	0.115812	79.293	1.10114	18.5476	29.3557	8.00591	128.207	36.3763	406.97	146.464	632.201	131.737	1226.52	245.87	4134.19	2.53227	9682.21	823.26	582.992	130.335	1.41213	658	3.5	-18.3	-14.7624	0.398963	0.965035	0.00103408	0.331808
GJT-2-02	Diorite	This study	0.12421	85.8223	1.54024	25.1251	37.6863	10.0675	149.973	42.5021	461.599	166.424	709.084	146.294	1360.7	273.595	4560.2	2.38785	9600.99	793.361	537.35	129.675	1.47643	654	3.8	-18.4	-14.636	0.409399	0.897766	0.000749046	0.339236
GJT-2-03	Diorite	This study	0.126598	83.015	1.47986	24.3551	35.9312	9.69296	140.753	39.5821	432.307	156.341	663.737	137.405	1267.08	256.089	4309.65	2.42813	8939.03	736.057	512.306	127.525	1.43675	655	3.7	-18.4	-14.6287	0.416692	0.966882	0.000790905	0.341184
GJT-2-04	Diorite	This study	0.0943523	70.6034	1.2539	19.1336	28.8862	8.34743	123.498	34.576	377.007	136.996	586.873	123.153	1158.06	233.455	3831.83	2.09987	9344.38	643.612	468.644	128.46	1.37335	644	3.7	-18.7	-15.0353	0.427269	1.11505	0.000962991	0.325551
GJT-2-05	Diorite	This study	0.165889	158.684	2.16744	37.7521	64.3416	18.9838	300.918	88.8615	790.369	286.037	1157.07	229.113	2070.36	409.866	7545.51	5.18995	8668.1	1915.18	792.845	127.764	2.41558	718	3.8	-16.7	-12.8266	0.417098	0.552776	0.000557063	0.381753
GJT-2-06	Diorite	This study	0.124525	71.6086	1.48742	19.1819	30.4266	8.1486	122.451	34.1331	378.087	136.835	597.036	126.52	1177.15	236.369	3889.52	2.1289	9964.67	720.03	535.891	128.297	1.34361	645	3.6	-18.7	-15.108	0.408131	1.04931	0.000959793	0.321188
GJT-2-07	Diorite	This study	0.0888286	65.9207	0.979532	17.5722	24.7926	6.66623	105.713	29.9223	336.209	123.248	534.322	110.878	1041.02	213.892	3455.34	2.10473	9516.78	641.877	460.166	129.256	1.39488	644	3.6	-18.7	-15.1355	0.398088	1.15209	0.00108569	0.32296
GJT-2-08	Diorite	This study	0	59.6761	1.02107	15.6562	24.9904	7.12139	101.662	29.1519	323.085	118.29	512.745	106.798	1007.15	204.859	3305.48	1.76044	9708.24	549.182	425.826	127.318	1.28969	631	3.6	-19.1	-15.4903	0.43194	1.30674	0.00115314	0.32079
GJT-2-09	Diorite	This study	0.143898	124.451	1.8962	29.8684	49.8687	13.399	203.308	57.5375	618.748	222.809	944.974	193.06	1758.29	351.767	6064.41	3.62761	9645.67	1238.18	724.568	126.932	1.70885	688	3.8	-17.5	-13.6676	0.406821	0.670834	0.000687068	0.351903
GJT-2-10	Diorite	This study	0.162319	75.7669	1.01466	15.9844	28.9104	8.47118	124.623	36.813	398.36	141.123	602.554	133.084	1229.77	211.177	4158.43	8.05781	8728.97	734.085	488.799	128.229	1.50181	759	2.6	-15.7	-13.0809	0.431461	1.03756	0.00113987	0.32393
GJT-2-11	Diorite	This study	0.0088061	81.2445	0.189497	4.51043	8.39047	2.83536	65.2108	22.5342	274.08	109.708	490.08	107.979	982.506	178.42	3330.63	6.58762	8292.07	755.931	475.516	127.58	1.58971	740	2.9	-16.1	-13.2146	0.370577	1.11263	0.00540817	0.27896
GJT-2-12	Diorite	This study	0.222942	72.9766	1.17742	20.0376	31.7412	8.66964	134.199	39.0473	416.911	148.321	624.156	136.695	1254.15	218.274	4283.84	8.23295	8350.55	652.891	429.208	133.121	1.52115	761	2.6	-15.6	-13.0041	0.406105	0.947994	0.000850167	0.332424
DJZ-1	Diorite	Duan, 2019	0.170364	185.306	1.65126	27.6893	43.2394	13.3536	182.436	50.8652	576.411	190.884	852.332	160.141	1631.09	258.484	6653.95	7.2661	8162.72	1808.14	749.859	129	2.4113	749	3.9	-15.9	-12.0429	0.45965	0.690793	0.00100577	0.353389
DJZ-2	Diorite	Duan, 2019	0.175449	111.596	1.20621	21.8499	33.9242	10.4909	148.306	41.217	468.952	155.746	693.543	132.362	1355.99	217.865	5344.57	5.52721	7364.49	850.12	450.642	129	1.88646	724	3.7	-16.5	-12.8603	0.452171	0.846037	0.000955619	0.345838
DJZ-3	Diorite	Duan, 2019	0.174957	190.801	1.32707	24.1455	39.275	12.4219	167.522	47.5079	535.795	179.213	797.725	151.113	1538.51	243.63	6285.72	8.92717	8089.24	2115.31	833.345	127	2.53834	769	3.6	-15.4	-11.7986	0.468183	0.744836	0.00125715	0.348256
DJZ-4	Diorite	Duan, 2019	0.218391	159.317	1.68541	26.1114	44.8774	13.9579	188.328	51.5737	589.578	193.686	854.493	160.958	1628.04	258.486	6675.53	4.82086	8029.49	1316.45	596.339	129	2.20755	712	4.2	-16.8	-12.675	0.464165	0.695323	0.000914004	0.362139
DJZ-5	Diorite	Duan, 2019	0.234035	170.122	2.28005	37.3929	53.6811	16.9811	219.239	59.1264	646.821	208.116	896.56	164.922	1657.48	257.995	7091.64	7.07829	7561.11	1288.23	537.468	129	2.39686	747	4	-16	-11.9384	0.478543	0.674798	0.000641543	0.390245
DJZ-6	Diorite	Duan, 2019	0.0839711	114.37	0.879079	15.8463	25.8737	8.50273	118.197	34.0105	394.055	133.589	602.884	115.237	1197.51	194.828	4530.4	8.75523	7037.01	988.483	490.473	129	2.01537	767	3.2	-15.5	-12.2542	0.470057	1.03756	0.00159312	0.329062
DJZ-7	Diorite	Duan, 2019	0.16353	117.618	1.32009	21.582	33.028	10.104	139.603	38.9441	445.837	149.388	674.644	128.679	1336.16	215.219	5118.38	4.96673	8173.2	934.378	497.605	131	1.87775	714	3.8	-16.8	-13.0036	0.454913	0.888783	0.00106476	0.33367
DJZ-8	Diorite	Duan, 2019	0.0274289	165.411	0.503417	10.0829	20.9256	6.77839	101.397	27.9359	319.179	107.698	483.983	92.1705	950.559	154.94	3646.65	11.6946	8095.37	4368.18	1141.77	130	3.82581	796	2.9	-14.8	-11.9469	0.449882	1.23369	0.00449869	0.33578
DJZ-9	Diorite	Duan, 2019	0.287974	180.405	2.14807	36.0512	53.8798	16.5256	217.936	59.7891	666.64	215.877	940.888	176.342	1782.85	279.693	7475.85	8.66724	7839.4	1373.62	607.573	130	2.26082	766	3.8	-15.5	-11.6628	0.466234	0.623653	0.000669375	0.373919
DJZ-10	Diorite	Duan, 2019	0.0216518	45.7995	0.264266	4.82496	8.9218	2.93344	46.3636	14.5915	185.437	69.9943	341.4	69.0485	758.165	132.39	2416.31	7.18437	6604.44	393.269	307.19	129	1.28022	748	2.2	-15.9	-13.7107	0.440947	1.82487	0.00392838	0.244587
DJZ-11	Diorite	Duan, 2019	0.300319	173.808	2.34086	36.5766	54.2496	17.0122	221.575	60.1155	661.884	213.299	924.931	172.407	1759.24	272.599	7268.93	8.10411	7470.59	1319.71	584.158	126	2.25916	760	3.9	-15.7	-11.7858	0.474378	0.652611	0.000653728	0.376234
DJZ-12	Diorite	Duan, 2019	0.0892406	73.4925	0.909687	13.276	19.4508	6.50474	88.9063	25.8441	295.468	102.908	470.182	90.938	959.603	161.944	3471.16	7.13277	7064.49	575.997	350.437	128	1.64365	748	2.9	-15.9	-13.0137	0.47821	1.37767	0.00159478	0.307907
DJZ-13	Diorite	Duan, 2019	0.191298	153.739	1.66591	29.1584	45.3475	14.1883	187.44	51.7156	575.937	189.938	832.201	157.765	1600.56	257.859	6562.58	4.63831	8322.32	1202.17	577.725	128	2.08087	708	4.1	-16.9	-12.7627	0.470486	0.716923	0.000803429	0.359835
DJZ-14	Diorite	Duan, 2019	0.175192	98.9095	1.18977	20.6801	31.936	10.1253	137.264	37.6882	423.893	139.515	622.917	118.32	1206.97	196.5	4652.96	5.18544	7812.73	854.333	420.685	129	2.03081	718	3.6	-16.7	-13.0986	0.467536	1.00481	0.00102791	0.351204
DJZ-15	Diorite	Duan, 2019	0.0936761	120.703	1.67988	25.5535	36.1796	11.2678	151.205	41.9755	475.444	158.096	703.87	132.534	1368.05	219.64	5348.15	6.05142	7347.84	910.963	480.515	130	1.89581	732	3.7	-16.3	-12.6543	0.465746	0.870854	0.000883209	0.347533
DJZ-16	Diorite	Duan, 2019	0.0527076	146.732	0.60835	10.9854	22.6864	7.48374	119.826	34.8776	410.695	140.256	633.675	119.601	1240.9	199.904	4785.73	9.81403	7642.82	1408.58	659.747	130	2.13504	779	3.3	-15.2	-11.9212	0.438818	0.916928	0.002791	0.330966
DJZ-17	Diorite	Duan, 2019	0.127128	112.678	1.37768	22.1522	33.7362	11.0964	145.817	39.7386	450.922	149.261	662.285	126.139	1294.16	208.797	4982.6	6.48601	7537.4	837.223	455.754	130	1.837	739	3.5	-16.2	-12.6318	0.483677	0.970733	0.00102086	0.348429
DJZ-18	Diorite	Duan, 2019	0.0282096	142.227	0.449775	9.39038	18.0757	6.10353	90.4786	25.7659	299.292	104.204	474.949	92.1932	966.795	158.93	3545.97	8.38511	8055.85	2916.52	927.138	131	3.14572	763	3.1	-15.6	-12.4885	0.461407	1.30122	0.00427135	0.309572
13LW03	Monzonite	Lan et al., 2019	0	15.8	0.09	1.39	3.2	1.07	18.7	6.4	81.2	31.4	162	34.1	334	67.9		7.53	7956	101	103	129.5	0.980583	752.794	1.27548	-15.8168	-14.5414	0.422875			0.243114
13LW03	Monzonite	Lan et al., 2019	0.02	33.3	0.18	2.64	5.34	1.4	27.4	9.04	110	40.6	201	39.2	363	69.7		10	8089	653	304	129.5	2.14803	780.533	1.3841	-15.1782	-13.7941	0.353839			0.30303
13LW03	Monzonite	Lan et al., 2019	0.05	48.5	0.38	7.03	11.5	3.21	55	17.3	217	79.5	391	76.9	716	137.9		10.1	7788	388	248	129.5	1.56452	781.533	2.20508	-15.1558	-12.9508	0.39021			0.303073
13LW03	Monzonite	Lan et al., 2019	0.05	40.3	0.54	9.06	14.8	4.23	73.8	21.7	254	90.1	432	85.5	789	144.2		6.68	8738	373	254	129.5	1.4685	741.516	2.22165	-16.0866	-13.8649	0.391296			0.321926
13LW03	Monzonite	Lan et al., 2019	0.03	57.5	0.21	4.01	6.45	2.07	40.4	13.9	180	67.6	341	68.3	649	119.6		9.75	8063	456	294	129.5	1.55102	777.997	2.38353	-15.2352	-12.8517	0.392034			0.27735
13LW03	Monzonite	Lan et al., 2019	0.01	37.3	0.15	2.22	4.47	1.65	28.8	10.4	141	55.4	282	58.3	564	103.4		9.39	7316	272	212	129.5	1.28302	774.25	1.94862	-15.3199	-13.3713	0.444588			0.25
13LW03	Monzonite	Lan et al., 2019	0.07	45.6	0.67	10.1	18.3	4.96	79.6	23.6	272	95.2	454	90.5	839	151		7.48	8560	388	263	129.5	1.47529	752.16	2.30775	-15.8318	-13.5241	0.397304			0.324195
13LW03	Monzonite	Lan et al., 2019	0.03	47.6	0.15	2.82	5.44	1.85	35.5	13	176	70.3	364	74.3	717	133.1		12.1	7526	343	273	129.5	1.25641	800.03	1.93232	-14.7493	-12.817	0.406988			0.245467
13LW03	Monzonite	Lan et al., 2019	0.01	31.4	0.16	3.22	4.97	1.55	24.2	8	101	37.6	189	38	358	66.2		11.8	7328	631	299	129.5	2.11037	797.421	1.15279	-14.8058	-13.653	0.432085			0.282123
13LW03	Monzonite	Lan et al., 2019	0.01	80.1	1.43	15.6	13.7	1	37.4	9.24	94.6	29.2	133	25.7	240	41.6		10.9	7923	1036	706	129.5	1.46742	789.259	2.10177	-14.9843	-12.8825	0.13506			0.394167
13LW03	Monzonite	Lan et al., 2019	0.08	58.9	0.86	11.9	21	5.85	98.6	29.6	338	118	571	112	1034	182		6.59	8417	561	349	129.5	1.60745	740.254	2.61649	-16.1171	-13.5007	0.393035			0.326886
13LW03	Monzonite	Lan et al., 2019	0.01	47.8	0.13	2.42	5.26	1.63	31.6	11.5	155	62.2	324	68.4	672	121.2		9.5	8056	315	279	129.5	1.12903	775.407	2.13075	-15.2937	-13.1629	0.386523			0.230655
13LW03	Monzonite	Lan et al., 2019	0.01	47.2	0.15	2.47	5.38	1.75	33.4	12.3	168	66.8	351	72.2	706	131.4		11.9	8022	306	263	129.5	1.1635	798.297	1.96454	-14.7868	-12.8223	0.399114			0.23796
13LW03	Monzonite	Lan et al., 2019	0.06	55.2	0.65	11	18.7	5.28	82.4	24.9	292	103	493	97.6	900	158.7		10.6	7661	489	293	129.5	1.66894	786.417	2.24305	-15.0471	-12.8041	0.411219			0.324444
13LW03	Monzonite	Lan et al., 2019	0.02	24.6	0.28	5.38	9.84	2.55	39.7	12.1	143	50.3	251	50.8	491	89.8		9.75	7512	170	140	129.5	1.21429	777.997	1.55346	-15.2352	-13.6818	0.394431			0.291242
13LW03	Monzonite	Lan et al., 2019	0.01	44.9	0.13	2.32	5.37	1.47	30.8	11	146	57.3	299	60.6	584	112.6		10.2	8470	404	275	129.5	1.46909	782.526	1.97289	-15.1337	-13.1608	0.349445			0.25
13LW03	Monzonite	Lan et al., 2019	0.07	73.5	0.68	9.52	17.8	5.19	92.8	28.9	349	126	619	119	1102	199.7		10.6	8248	674	400	129.5	1.685	786.417	2.46994	-15.0471	-12.5772	0.390397			0.316697
Jiaoyu Pluton
Jy-9-01	Diorite	This study	0	18.0137	0.0779229	1.67875	2.69735	0.850586	15.3872	5.62493	71.9385	28.9675	134.347	30.0318	282.407	61.5529	896.65	7.26612	9609.98	241.211	218.619	128.258	1.10334	749.409	0.880925	-15.8972	-15.0162	0.40364	4.50164	0.0119672	0.254734
Jy-9-02	Diorite	This study	0.0120231	33.255	0.203521	3.29005	6.20035	1.94446	34.4407	12.4536	151.014	59.2932	278.015	58.61	553.284	116.094	1863.81	9.48381	8456.58	420.685	288.648	128.816	1.45744	775.237	1.47284	-15.2975	-13.8247	0.406797	2.18261	0.00542316	0.272942
Jy-9-03	Diorite	This study	0.0212029	16.9318	0.34338	6.22493	10.479	2.95624	50.1462	15.2737	170.412	61.5268	272.867	56.4405	514.617	105.559	1853.7	7.31265	8914.28	136.574	135.186	129.63	1.01027	750.013	1.18494	-15.8828	-14.6978	0.394261	2.12689	0.00146733	0.331144
Jy-9-04	Diorite	This study	0.00594937	8.44193	0.0506293	0.91756	2.15205	0.796776	14.1178	4.5575	57.5475	22.8706	114.917	25.7857	263.598	59.2362	746.173	5.69125	8782.7	51.7541	84.1887	129.284	0.614739	726.815	0.60533	-16.4475	-15.8422	0.441927	5.92258	0.0123301	0.218316
Jy-9-05	Diorite	This study	0.0498991	18.4895	0.434831	5.83868	9.42765	2.68263	47.3841	14.2609	163.938	60.6044	283.522	61.9365	584.085	125.33	1914.7	5.61477	9374.92	221.419	219.537	129.117	1.00857	725.592	1.14626	-16.478	-15.3317	0.388031	2.02658	0.0016539	0.280675
Jy-9-06	Diorite	This study	0.0237576	21.8497	0.509649	7.37114	12.8875	3.56555	64.1167	20.1934	229.532	83.715	374.895	77.7126	700.354	145.599	2535.18	7.66932	8666.95	229.765	209.5	129.516	1.09673	754.542	1.20606	-15.7756	-14.5695	0.379211	1.4958	0.00116924	0.327737
Jy-9-07	Diorite	This study	0.0420426	24.8681	0.252013	5.31997	9.76771	2.68315	49.2487	15.7946	182.817	69.2609	319.325	67.9849	635	135.491	2138.55	7.12978	8770.17	262.149	244.961	128.603	1.07017	747.62	1.35843	-15.9398	-14.5814	0.374003	1.74886	0.00218582	0.287901
Jy-9-08	Diorite	This study	0.0621541	32.7585	0.622526	9.90815	17.4965	5.18674	97.2661	30.4614	345.842	124.758	551.477	112.889	1005.32	207.156	3712.98	8.41851	8110.15	415.064	317.267	129.042	1.30825	763.524	1.46806	-15.5657	-14.0977	0.384381	1.03524	0.000890448	0.344012
Jy-9-09	Diorite	This study	0.0182787	14.4509	0.265504	5.07599	8.61701	2.36245	40.1717	11.6529	132.398	48.1878	220.928	44.7175	423.032	87.1807	1485.76	7.42281	8813.12	112.456	120.75	129.516	0.931316	751.431	0.994924	-15.8491	-14.8542	0.388193	2.61276	0.00191613	0.312973
Jy-9-10	Diorite	This study	0	24.5419	0.506497	7.43309	14.5763	3.88433	71.0198	21.8204	244.473	87.9548	383.964	77.2895	694.196	141.37	2624.87	8.95619	8932.3	271.15	215.858	130.558	1.25615	769.577	1.24704	-15.4263	-14.1793	0.369085	1.40611	0.00125786	0.352167
Jy-9-11	Diorite	This study	0	29.704	0.546837	7.7026	15.0631	4.15871	72.4072	23.2649	253.278	92.0444	422.495	88.7129	794.11	168.485	2826.32	4.04883	9097.69	329.055	286.107	128.003	1.15011	696.938	2.0235	-17.2154	-15.1919	0.384976	1.36211	0.00136444	0.318946
13LW15	Monzodiorite	Lan et al., 2019	0.09	36.5	0.61	8.72	12.6	5.07	52.9	15.9	183	68.7	357	80.3	809	191		3.52	9168	914	592	131	1.54392	685.169	1.87105	-17.5313	-15.6603	0.600369			0.226205
13LW15	Monzodiorite	Lan et al., 2019	0.05	49.5	0.5	7.21	12.4	3.92	64.2	19.5	227	82.5	401	81.3	730	160		9.74	7620	713	334	131	2.13473	777.894	2.01335	-15.2375	-13.2242	0.424748			0.310959
13LW15	Monzodiorite	Lan et al., 2019	0.03	25.6	0.05	0.72	1.42	0.56	7.1	2.37	32	14.2	82.7	20.6	221	57.4		3.03	8766	75	117	131	0.641026	672.877	2.79285	-17.8699	-15.077	0.539186			0.144796
13LW15	Monzodiorite	Lan et al., 2019	0.02	16.3	0.18	2.52	4.02	1.38	19.1	6.2	76.5	31.1	169	40.4	404	97.6		3.82	8488	241	196	131	1.22959	692.011	1.35998	-17.3467	-15.9867	0.481474			0.189356
13LW15	Monzodiorite	Lan et al., 2019	0.09	21.1	0.51	6.66	10.2	3.08	45.8	13.2	154	57.7	289	62.6	573	128		6.26	8430	213	181	131	1.1768	735.504	1.44845	-16.2329	-14.7844	0.435654			0.268761
13LW15	Monzodiorite	Lan et al., 2019	0.01	13.1	0.09	1.46	2.56	1.04	17.5	6.27	85.2	35.9	198	46.6	463	112		4.56	8799	300	270	131	1.11111	707.165	0.548701	-16.9471	-16.3984	0.475027			0.184017
13LW15	Monzodiorite	Lan et al., 2019	0.17	57.2	1.4	19.8	25.1	6.64	89.9	25.3	286	103	508	107	975	213		5.95	8119	524	368	131	1.42391	730.852	2.6081	-16.3473	-13.7392	0.427341			0.293333
13LW15	Monzodiorite	Lan et al., 2019	0.12	58.8	0.96	13.2	21.9	7.03	106	31.9	368	136	678	144	1319	286		5.29	8729	963	546	131	1.76374	720.245	2.41555	-16.6123	-14.1967	0.446071			0.278999
13LW15	Monzodiorite	Lan et al., 2019	0.1	38	0.81	12.4	17.3	4.85	68	19.5	220	80.5	398	83	764	167		5.69	8304	367	293	131	1.25256	726.795	2.13465	-16.448	-14.3133	0.432303			0.287958
13LW15	Monzodiorite	Lan et al., 2019	0.12	45.8	0.87	12.9	20	5.66	83.5	24.7	283	103	514	106	972	207		6.02	8355	546	363	131	1.50413	731.92	2.22389	-16.321	-14.0971	0.42343			0.291152
13LW15	Monzodiorite	Lan et al., 2019	0.07	80.2	0.63	10.7	20.8	6.24	97.5	28.5	320	116	563	115	1012	218		10.9	7527	1183	523	131	2.26195	789.259	2.36421	-14.9843	-12.6201	0.423618			0.316206
13LW15	Monzodiorite	Lan et al., 2019	0.07	31.7	0.6	8.99	14.8	4.22	58.5	17.2	196	73	375	81.3	759	168		4.59	8490	356	292	131	1.21918	707.736	2.00939	-16.9323	-14.923	0.438457			0.258235
13LW15	Monzodiorite	Lan et al., 2019	0.02	14.9	0.12	2.11	3.18	1.18	13.8	4.3	54.4	22.8	130	32.2	340	87.3		3.66	8799	262	242	131	1.08264	688.42	1.05817	-17.4433	-16.3851	0.544569			0.16
13LW15	Monzodiorite	Lan et al., 2019	0.07	32.4	0.63	9.99	14.9	4.4	62	18.3	211	77.4	386	82.3	759	165		4.92	8093	342	271	131	1.26199	713.815	2.05183	-16.7758	-14.7239	0.442575			0.277997
13LW15	Monzodiorite	Lan et al., 2019	0.01	6.1	0.05	0.72	1.57	0.59	7.73	2.68	36.2	15.8	94.9	24.6	269	71.3		3.88	8929	104	155	131	0.670968	693.326	-0.156382	-17.3115	-17.4679	0.517769			0.134572
13LW15	Monzodiorite	Lan et al., 2019	0.11	37.9	0.76	11.1	18.9	5.14	71.8	20.7	237	86.5	431	91.5	845	183		5.37	8421	377	293	131	1.28669	721.587	2.18033	-16.5785	-14.3981	0.426573			0.280473
13LW15	Monzodiorite	Lan et al., 2019	0.12	23.9	0.55	7.6	12.8	3.87	57.9	16.7	195	72.1	355	72.7	653	144		5.93	8143	210	177	131	1.18644	730.545	1.73122	-16.3549	-14.6237	0.434601			0.298622
13LW15	Monzodiorite	Lan et al., 2019	0.16	50.1	1.23	16.7	21.9	6.25	82	23.8	272	99	488	104	952	206		4.63	8449	573	399	131	1.43609	708.491	2.52553	-16.9128	-14.3873	0.450894			0.285714
13LW15	Monzodiorite	Lan et al., 2019	0.01	34.8	0.17	2.82	5.2	1.78	34.8	12	157	62.9	329	70.3	651	144		8.92	7516	296	243	131	1.21811	769.179	1.75404	-15.4355	-13.6814	0.404531			0.241167
Jinniushan Pluton
Ts-8-01	Diorite	This study	0.204623	57.7542	2.12427	22.1038	18.5574	8.0629	51.9197	13.6741	142.889	53.1582	244.878	57.6855	628.133	149.583	1702.53	0.99658	6877.79	897.345	493.393	127.468	1.81872	590.684	3.92201	-20.3898	-16.4678	0.794128	4.66439	0.00153469	0.227481
Ts-8-02	Diorite	This study	0.0937045	37.5777	0.564837	7.56009	8.23229	4.54929	29.2854	8.53996	95.0249	37.4343	174.532	42.6152	470.524	119.008	1195.82	0.845618	7089.18	926.229	481.292	130.462	1.92446	579.738	3.33951	-20.7634	-17.4239	0.89574	7.49058	0.00415659	0.201956
Ts-8-03	Diorite	This study	0.0718575	32.1668	0.699718	8.75285	8.70345	4.71061	28.2062	8.26206	90.1422	34.8533	168.957	40.9522	448.205	112.613	1141.9	0.630533	7049.75	666.532	402.529	128.522	1.65586	560.856	3.47978	-21.4319	-17.9522	0.919142	8.04924	0.00321833	0.201118
Ts-8-04	Diorite	This study	0.0408418	37.7474	0.171932	2.6071	4.50554	1.55952	23.2524	6.1837	65.8667	24.8943	111.261	23.4575	225.951	47.7597	755.509	1.53984	9921.85	196.061	173.813	128.817	1.128	621.084	3.71143	-19.402	-15.6905	0.465809	6.1655	0.0191642	0.291508
Ts-8-05	Diorite	This study	0.0852226	60.2401	1.13766	14.676	25.4427	7.17961	135.631	41.4273	460.843	168.543	716.074	149.69	1336.4	271.389	4865.58	3.77632	9006.8	747.909	519.394	127.817	1.43996	691.043	2.79401	-17.3726	-14.5786	0.373648	0.767943	0.000843616	0.34484
Ts-8-06	Diorite	This study	0.0998217	24.7217	0.448623	5.71968	5.58001	2.88636	19.8941	5.69024	69.9896	28.7062	141.487	36.0653	402.591	102.745	935.368	0.567918	6678.56	428.475	323.434	126.918	1.32477	554.328	3.30364	-21.6705	-18.3668	0.837518	8.95389	0.00462087	0.173848
Ts-8-07	Diorite	This study	0.051665	16.916	0.400078	4.53745	4.26475	2.27891	14.85	4.19273	51.9437	20.5829	105.641	26.9462	298.972	77.6744	691.76	0.341448	6875.64	262.227	235.496	129.482	1.11351	523.975	3.36166	-22.8331	-19.4714	0.87547	12.6557	0.00538928	0.173741
Ts-8-08	Diorite	This study	0.151854	49.3877	1.57257	17.9171	15.7391	7.57144	49.4437	13.3122	143.427	53.8783	249.12	58.4001	613.395	144.761	1686.42	1.00936	7170.86	827.195	482.206	128.926	1.71544	591.546	3.65892	-20.3608	-16.7019	0.829767	4.92028	0.0016345	0.233824
Ts-8-09	Diorite	This study	0.272563	61.9995	1.93868	21.7191	19.582	9.0656	53.9613	14.947	156.475	56.5131	262.206	59.7236	638.282	150.812	1812.41	1.06021	6804.93	1108.13	554.063	128.868	2.00001	594.882	3.89055	-20.2492	-16.3586	0.852609	4.70429	0.00157504	0.245151
Ts-8-10	Diorite	This study	0.183664	46.2935	1.53059	16.0912	13.2486	6.78503	41.3034	11.4625	125.828	47.2196	223.116	52.3707	569.222	134.575	1528.44	0.820422	7059.23	757.548	479.087	128.686	1.58123	577.753	3.73218	-20.8323	-17.1001	0.886743	5.80162	0.00188227	0.221052
Ts-8-11	Diorite	This study	0.0564634	19.6483	0.378358	4.35977	4.08875	2.07331	15.0873	4.5779	54.1966	22.8973	121.248	31.9661	367.825	86.4434	773.098	2.33276	6730.84	403.08	308.06	128.273	1.30845	652.171	1.72036	-18.4612	-16.7408	0.807025	10.4388	0.00582942	0.147343
13LW58	Monzodiorite	Lan et al., 2019	1.13	90.8	3.71	36	26.9	12.2	72.9	19.8	202	65.3	311	67.2	737	163		3.95	5702	2723	967	130.7	2.81593	694.839	2.92742	-17.2711	-14.3437	0.842255			0.274084
13LW58	Monzodiorite	Lan et al., 2019	0.11	19.7	0.45	6.4	8.19	2.9	36.6	11.5	141	52.8	256	48.7	453	92.4		16	8718	201	132	130.7	1.52273	829.947	0.788672	-14.1208	-13.3321	0.512082			0.311258
13LW58	Monzodiorite	Lan et al., 2019	0.77	62.2	2.31	22.6	17.2	7.46	50.5	13.5	150	54.4	288	64.5	725	168		4.15	5627	1485	768	130.7	1.93359	699.044	2.42772	-17.1597	-14.732	0.773842			0.206897
13LW58	Monzodiorite	Lan et al., 2019	1.67	107	5.02	44.4	33.2	12.9	93.2	24.2	250	80.5	386	83.4	889	191		11.3	5881	2222	864	130.7	2.57176	792.951	2.39774	-14.9032	-12.5055	0.708984			0.281215
13LW58	Monzodiorite	Lan et al., 2019	0.65	63.5	1.37	18.1	17.2	8.13	57.4	15	162	57.2	293	64.4	706	157		4.85	5751	2585	1013	130.7	2.55183	712.554	2.08794	-16.8081	-14.7202	0.791032			0.229462
13LW58	Monzodiorite	Lan et al., 2019	1.84	99.7	4.88	39.4	28.5	12.1	74.4	19.5	198	64.9	318	69.2	761	166		10.7	5620	1847	755	130.7	2.44636	787.372	2.43949	-15.026	-12.5865	0.803341			0.260184
13LW58	Monzodiorite	Lan et al., 2019	1.4	92.5	4.11	36.4	27	11.2	74.4	19.9	202	67.6	333	72.4	798	171		3.95	5490	1952	822	130.7	2.3747	694.839	3.10067	-17.2711	-14.1705	0.763965			0.253133
13LW58	Monzodiorite	Lan et al., 2019	5.94	104	5.23	40.7	29.3	13	82.8	21.4	217	70.2	334	70.7	750	156		15.1	6128	2248	899	130.7	2.50056	823.611	2.06222	-14.2511	-12.1888	0.806897			0.289333
Tietonggou Pluton
Ttg-41-01	Diorite	This study	0	5.05459	0.0164307	0.147078	0.354786	0.168251	1.75258	0.544287	7.38346	3.08169	15.9137	4.15316	44.3862	11.6908	963.777	1.15921	9455.95	53.9686	115.462	131.382	0.467415	601.009	0.821625	-20.0463	-19.2247	0.652319	6.76836	0.0356584	0.166346
Ttg-41-02	Diorite	This study	0.0751501	12.1341	0.0869223	0.718251	1.19642	0.368901	3.90359	1.33602	15.1019	6.06953	29.7489	6.70611	70.3172	17.0575	994.392	2.2574	10308.6	66.9942	131.457	130.542	0.509629	649.635	1.65104	-18.5355	-16.8844	0.521866	5.24809	0.0169893	0.214769
Ttg-41-03	Diorite	This study	0.0232821	49.0613	0.137649	2.06755	4.3559	1.92848	24.8552	7.13769	77.5684	28.876	134.416	28.5751	266.023	57.7554	908.81	8.4918	9508.98	293.469	247.384	129.002	1.18629	764.367	2.37785	-15.5462	-13.1683	0.566618	6.23473	0.0261101	0.291586
Ttg-41-04	Diorite	This study	0.0266347	50.6595	0.0844855	1.78413	3.91729	1.65174	23.1283	7.01028	76.4353	29.7259	138.413	29.6123	280.945	60.0701	925.13	6.16237	9877.96	268.774	268.914	128.352	0.99948	734.06	2.63952	-16.2683	-13.6288	0.53052	5.73454	0.0306924	0.272065
Ttg-41-05	Diorite	This study	0	54.52	0.0949495	1.59527	3.30644	1.44686	22.0228	7.04671	79.4964	31.5663	147.17	31.2597	295.261	61.7522	981.656	15.3025	10059.8	191.05	259.946	128.311	0.734963	825.063	2.00685	-14.2211	-12.2142	0.518363	5.2805	0.0348147	0.269241
Ttg-41-06	Diorite	This study	0.0155226	81.4204	0.113994	2.56757	7.10425	3.18522	38.6674	12.0302	133.9	50.5328	223.287	45.503	407.334	80.8006	1459.68	7.44995	9658.71	315.147	334.695	128.47	0.941595	751.777	3.10868	-15.8409	-12.7322	0.587532	4.02507	0.0217246	0.328723
Ttg-41-07	Diorite	This study	0	38.4591	0.108481	1.79578	2.4439	1.02341	14.7153	4.52797	52.051	18.9439	91.8822	20.1656	188.939	41.515	623.704	6.14877	10518.6	215.415	240.444	130.792	0.895904	733.857	2.25984	-16.2733	-14.0134	0.521734	8.36509	0.0343375	0.275491
Ttg-41-08	Diorite	This study	0.0404213	117.687	0.159774	2.4798	6.69841	3.43635	42.618	12.8964	140.541	53.9479	238.389	48.1754	428.166	85.3716	1578.22	6.70334	9443.23	463.074	395.583	130.949	1.17061	741.841	3.69456	-16.0787	-12.3842	0.621782	3.93977	0.0300707	0.32824
Ttg-41-09	Diorite	This study	0.0436947	40.9675	0.113336	1.37315	4.07589	1.48697	20.4932	6.4517	74.8522	29.2951	139.062	30.3575	288.13	59.336	906.816	3.98503	9485.91	102.455	178.367	130.607	0.574406	695.588	3.00536	-17.2512	-14.2458	0.497404	5.48518	0.0329005	0.259786
Ttg-41-10	Diorite	This study	0.000982855	31.4804	0.0814284	1.79096	3.97205	1.23648	18.8471	5.79242	69.3549	27.1292	127.885	27.2462	255.13	56.1037	838.918	5.22479	10620	161.267	189.636	130.055	0.850406	719.139	2.25973	-16.6403	-14.3805	0.4369	5.2079	0.0209524	0.271841
Ttg-41-11	Diorite	This study	0	27.7845	0.171877	2.92821	5.40805	1.83497	25.498	8.1801	97.5843	39.603	183.061	38.5852	357.561	76.7207	1214.58	14.1587	8574.52	164.024	168.017	129.749	0.976237	816.653	1.28254	-14.3958	-13.1133	0.477727	3.93328	0.00781223	0.272917
Reference
Duan, Z., 2019, The mineralization and mechanism of the iron skarn deposits in Laiwu district, Shandong Province: Unpublished Ph.D. thesis, Wuhan, China University of Geoscience (Wuhan), 311 p (in Chinese with English abstract).
Lan, T.G., Fan, H.R., Santosh, M., Hu, F.F., Yang, K.F., Yang, Y.H., and Liu, Y.S., 2013, Crust-mantle interaction beneath the Luxi Block, eastern North China Craton: evidence from coexisting mantle- and crust-derived enclaves in a quartz monzonite pluton: Lithos, v. 177, p. 1–16.
1Titanium-in-zircon temperatures were calculated using the equation (logTizircon(ppm) = 5.711–4800/ TZr(K)–logαSiO2 + logαTiO2) of Ferry and Watson (2007)
2, 4The ΔFMQ values and logfO2 were calculated following the equation of Loucks et al. (2020): logƒO2(sample)–logƒO2(FMQ) = 3.998 (±0.124)×log [Ce/sqrt (Ui ×Ti)] +2.284 (±0.101)
3The FMQ values were calculated following the equation of Myers and Eugster (1983): log fO2 = –24,441.9/T (K) + 8.290 (±0.167)
